# Supplementary material for: Enhancing the efficacy of glycolytic blockade in cancer cells via RAD51 inhibition
Source: PubMed Central journal article supplement — Cancer Biol Ther. 2018 Sep 5;20(2):169–82. doi: 10.1080/15384047.2018.1507666 (PMC6343731; doi:10.1080/15384047.2018.1507666), 2018-09-05
Supplement: kcbt-20-02-1507666-s001.pdf [file kcbt-20-02-1507666-s001.pdf]

Supplementary Figure 1: Colorized 3D rendering of the micro-computed tomography of a control *Trp53*<sup>+/+</sup> and a *Trp53*<sup>-/-</sup> mouse with a thymic lymphoma tumor.

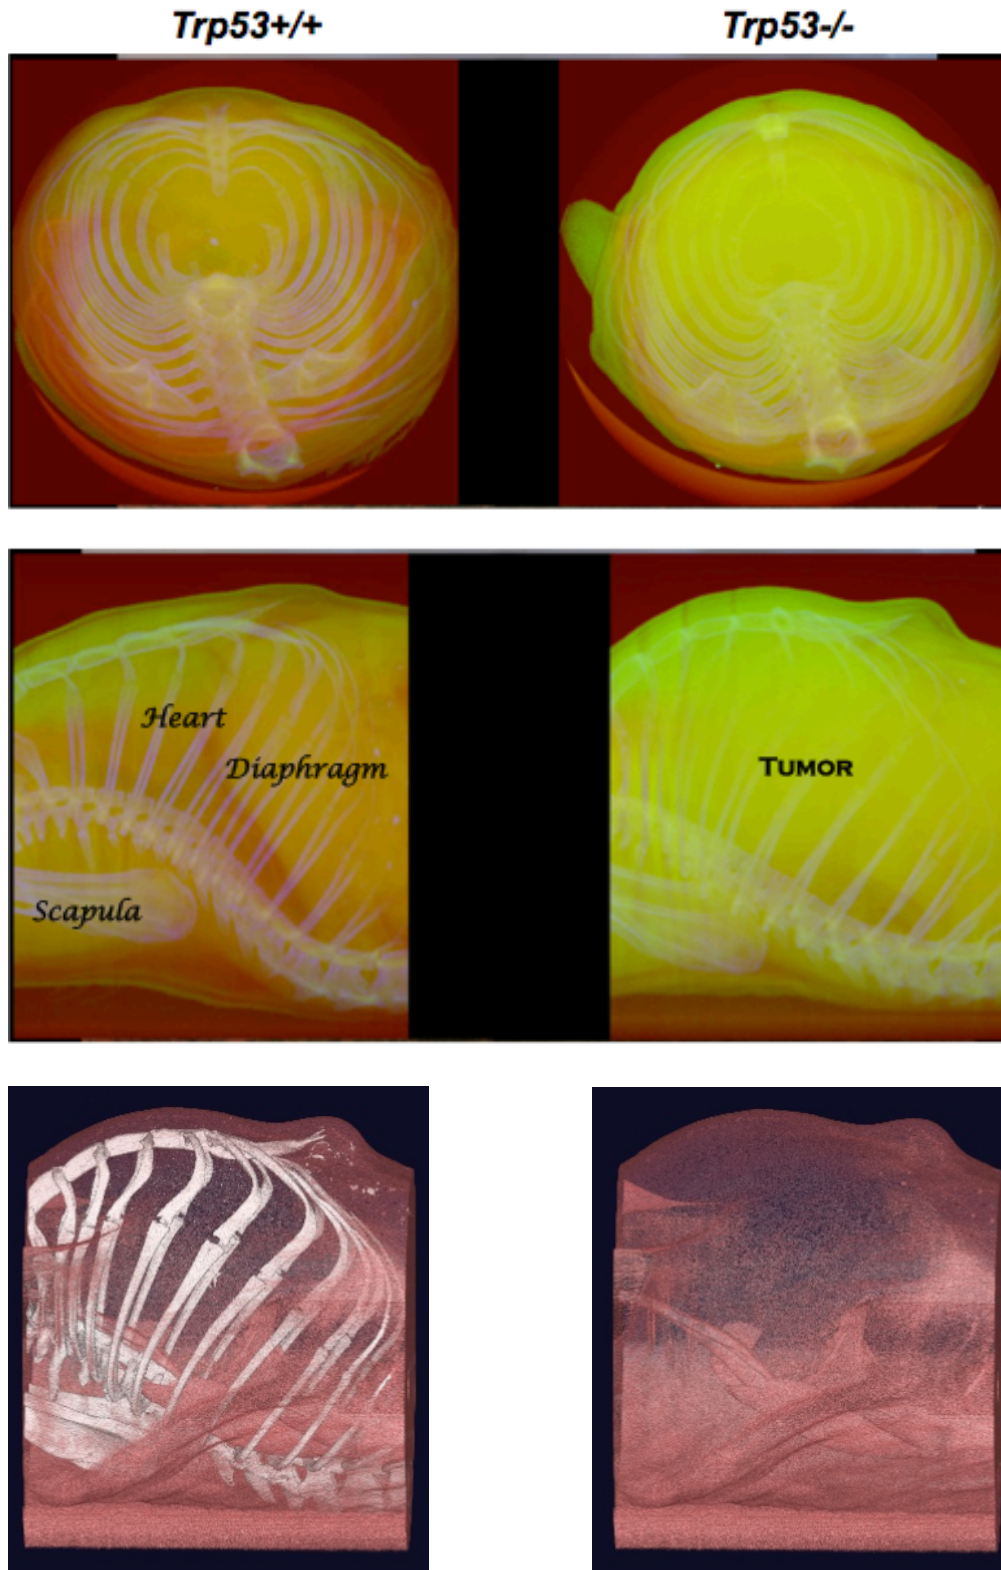

## Supplementary Figure 2: Heatmap of the top and bottom 20 differentially expressed genes in two PDX human lung carcinomas, TM00244 and TM00921.

Heatmap Top/Bottom 20 genes

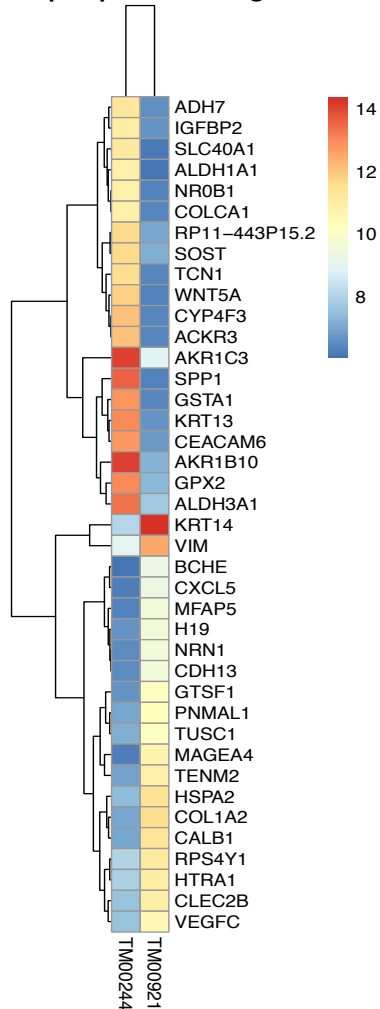

**Supplementary Figure 3: Generation and Validation of AID Knock-out (AKO) MEC1 cells (A) schematic of the knock-out (B) PCR validation of AKO (C) Sensitivity of AKO to DIDS (D) Spleen weights of MEC1 and AKO with DIDS treatment.**

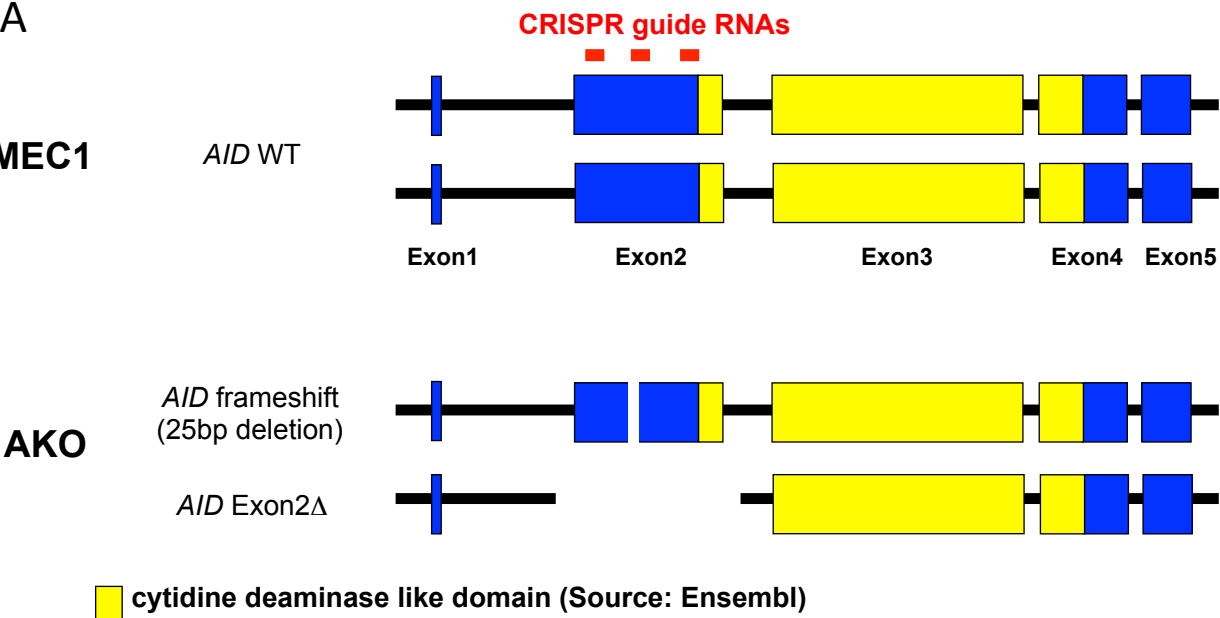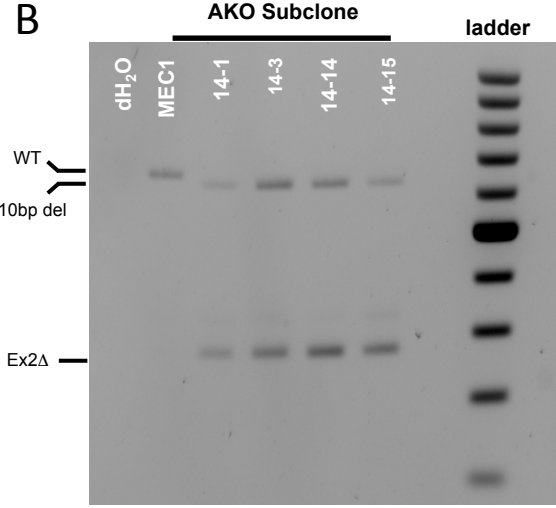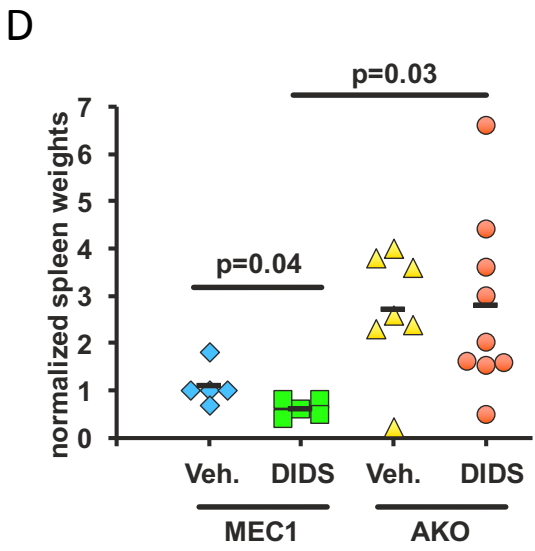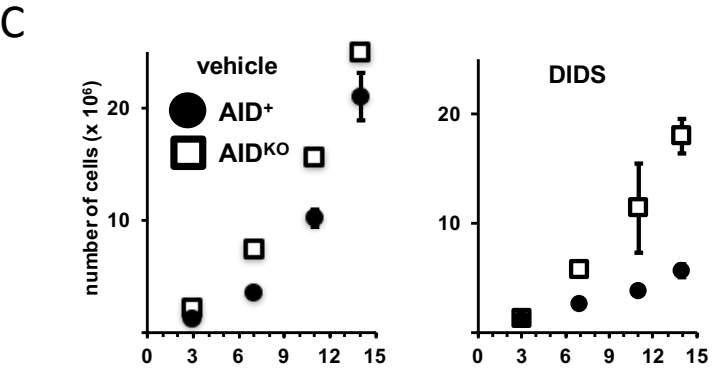

**Supplementary Figure 4: Titration curves of MEC1 and SuDHL cells with DIDS and B02 RAD51 inhibitors.**

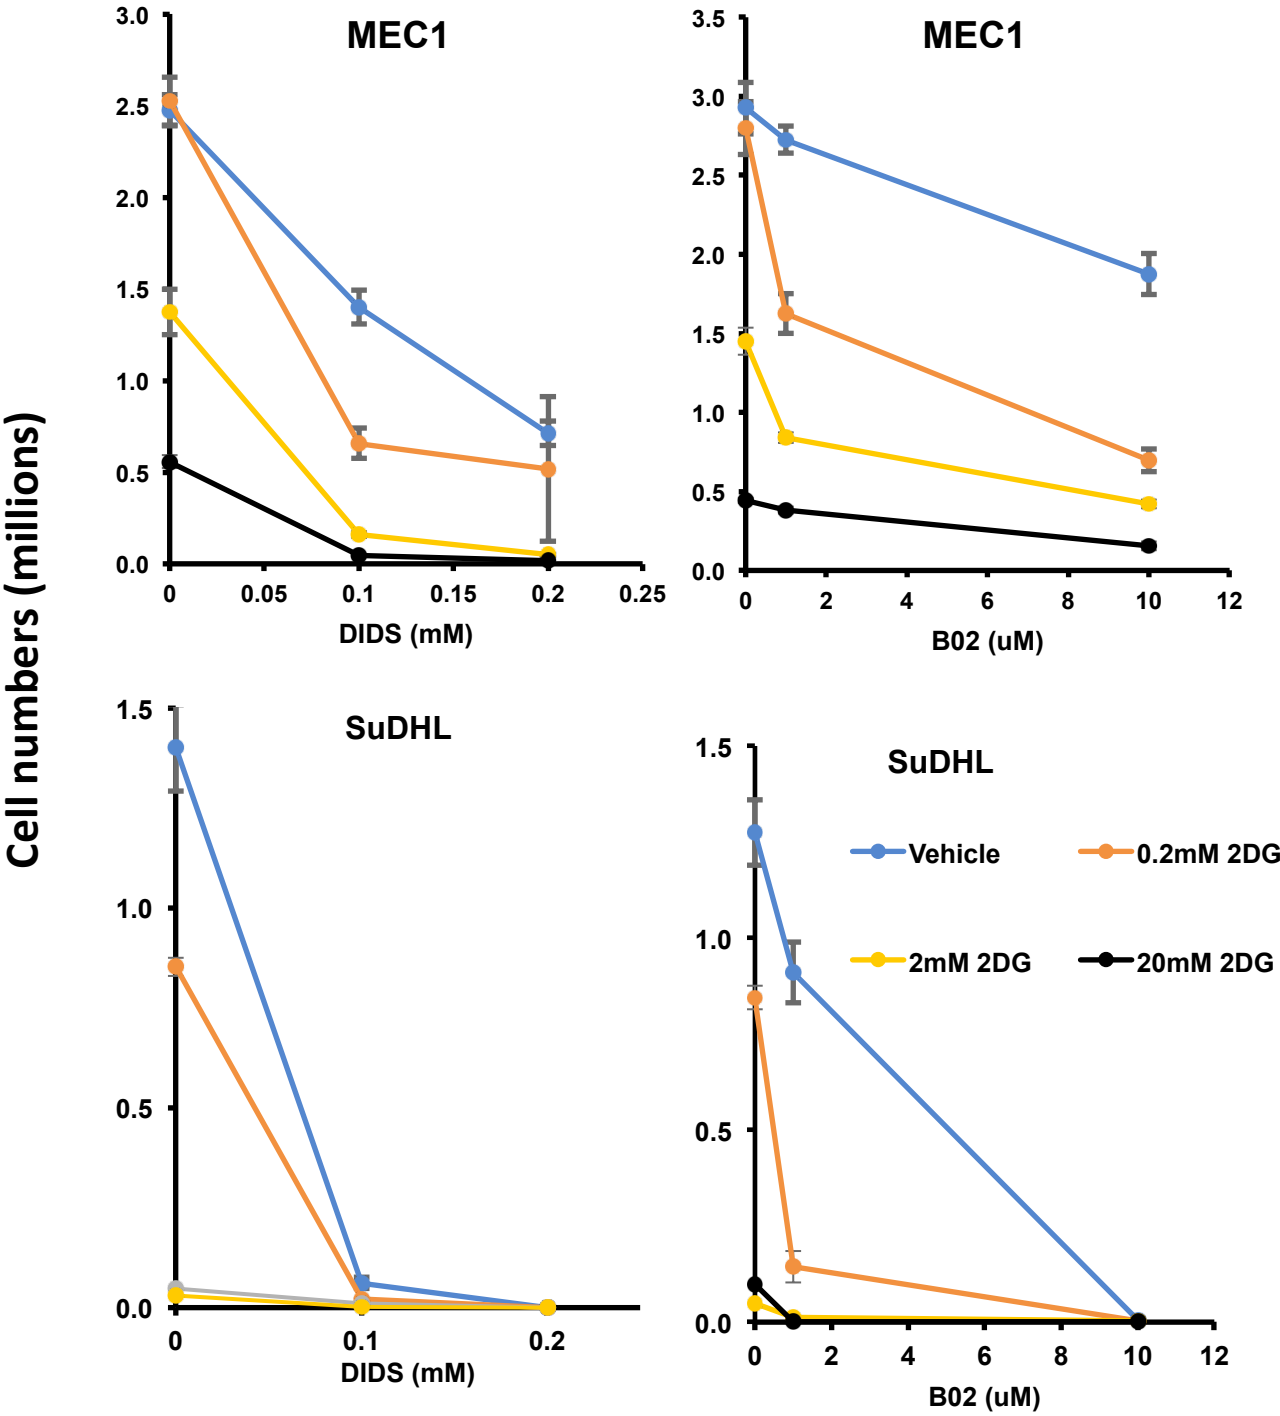

Supplementary Figure 5: Visual concept of the study.

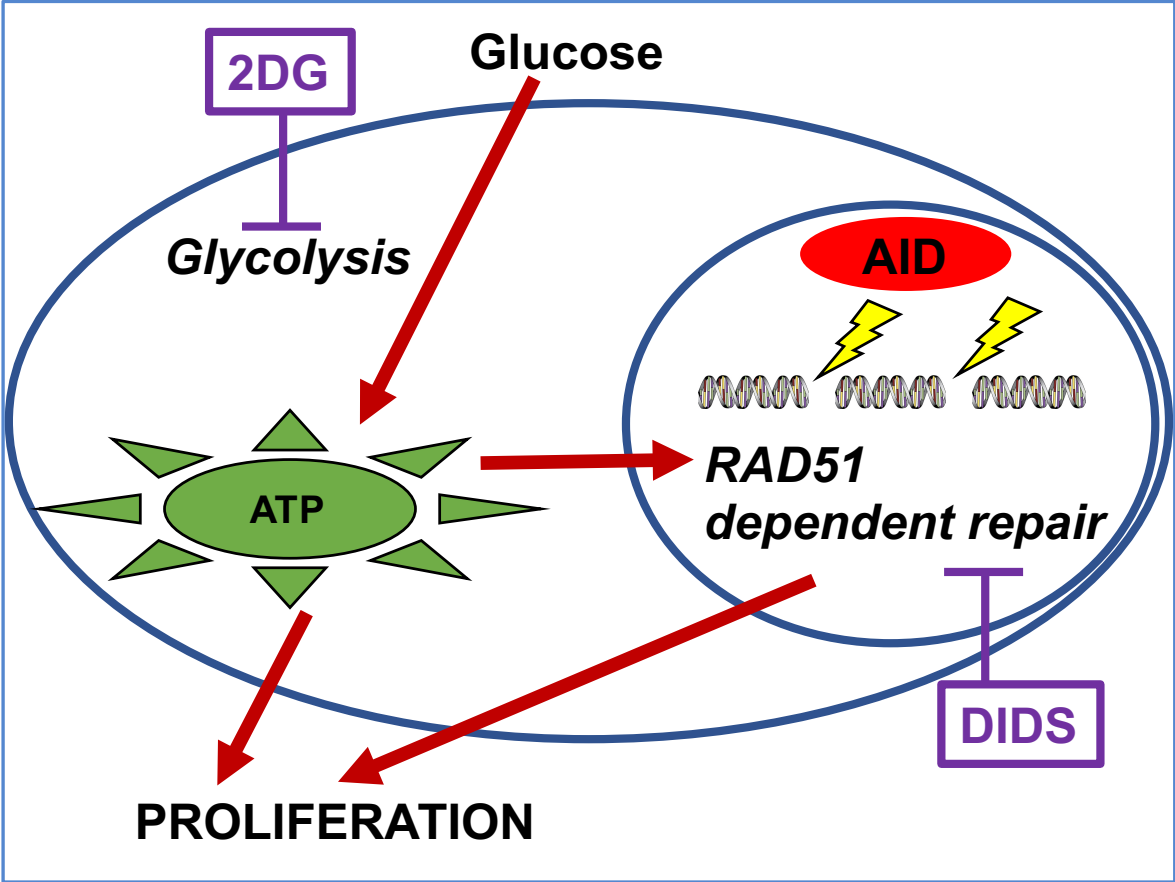

**Supplementary table 1: Table of general gene functions of differentially expressed genes in two PDX human lung carcinomas, TM00244 and TM00921.**

| <b>Gene</b> | <b>Function</b>                                                                                                                |
|-------------|--------------------------------------------------------------------------------------------------------------------------------|
| ADH7        | Phenylalanine metabolism, metabolism and oxidoreductase activity and retinol binding.                                          |
| IGFBP2      | Insulin-like growth factor binding and insulin-like growth factor II binding.                                                  |
| ALDH1A1     | Glycosaminoglycan metabolism, oxidoreductase activity and acyl-CoA dehydrogenase activity.                                     |
| TCN1        | Innate Immune System and metabolism, and cobalamin binding.                                                                    |
| CYP4F3      | Arachidonic acid metabolism, iron ion binding and oxidoreductase activity with incorporation or reduction of molecular oxygen. |
| AKR1C3      | Metabolism, oxidoreductase activity and aldo-keto reductase (NADP) activity.                                                   |
| GSTA1       | Glutathione metabolism and drug metabolism, and glutathione transferase activity.                                              |
| AKR1B10     | Metabolism and acetone degradation, aldo-keto reductase (NADP) activity and indanol dehydrogenase activity.                    |
